# Supplementary material for: Sharing interoperable workflow provenance: A review of best practices and their practical application in CWLProv
Source: PubMed Central journal article supplement (PMC6824458; doi:10.1093/gigascience/giz095), 2019-11-01
Supplement: giz095_response_to_reviewer_comments_original_submission.pdf [file giz095_response_to_reviewer_comments_original_submission.pdf]

## Author's Response To Reviewer Comments

Close

Hi,  
We have provided detailed responses in a pdf document (attached as supplementary material).  
Please refer to that.  
Cheers,

Close
