# Supplementary material for: Sharing interoperable workflow provenance: A review of best practices and their practical application in CWLProv
Source: PubMed Central journal article supplement (PMC6824458; doi:10.1093/gigascience/giz095), 2019-11-01
Supplement: giz095_response_to_reviewer_comments_revision_1.pdf [file giz095_response_to_reviewer_comments_revision_1.pdf]

## Author's Response To Reviewer Comments

Close

Dear Editor,  
We have provided the response to reviews and editor's notes in the supplementary material.  
Cheers,

Close
